# Supplementary material
Source: PubMed Central journal article supplement (PMC7564279)

**Supplementary Figure 1. mRNA expression of four embryonic GAD1 transcript in human DLPCF across the lifespan.**

Four GAD1 transcripts, I80, I86, 8A and 8B have been quantified in a DLPCF sample cohort across lifespan. Their expression showed similar life trajectory in human DLPCF, high in fetal stage and low in adult life. The x-axis before birth gestational age is in weeks (wks) and after birth the x-axis shifts to years (yrs). The expression levels on the y-axis were Log<sub>2</sub> normalized. Each colorful dot represents an individual subject. The black dot indicates the best fit curve for lifetime expression.

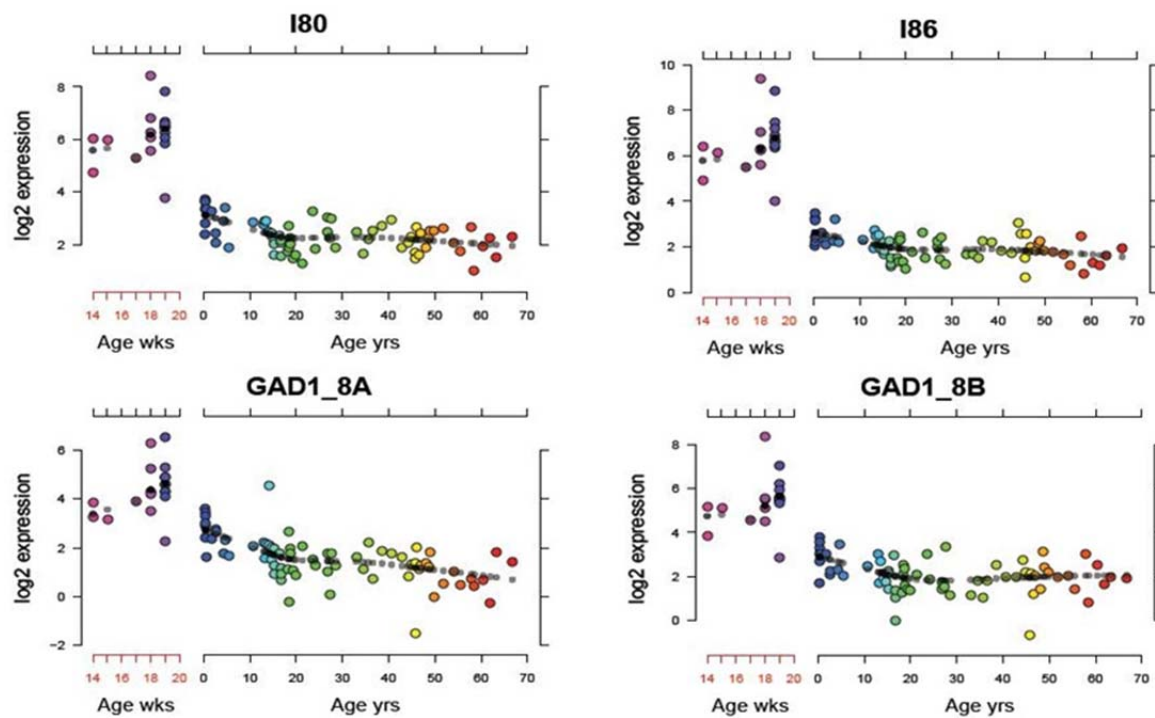

**Supplementary Figure 2. Four embryonic GAD1 transcripts and full length GAD1 transcript expressed in transfected HEK293 cell line.**

The Western blot results indicate that the four embryonic transcripts were expressed in transfected HEK293 cells at their predicted sizes. Control is the protein extracted from the DNA-free transfected HEK cells.

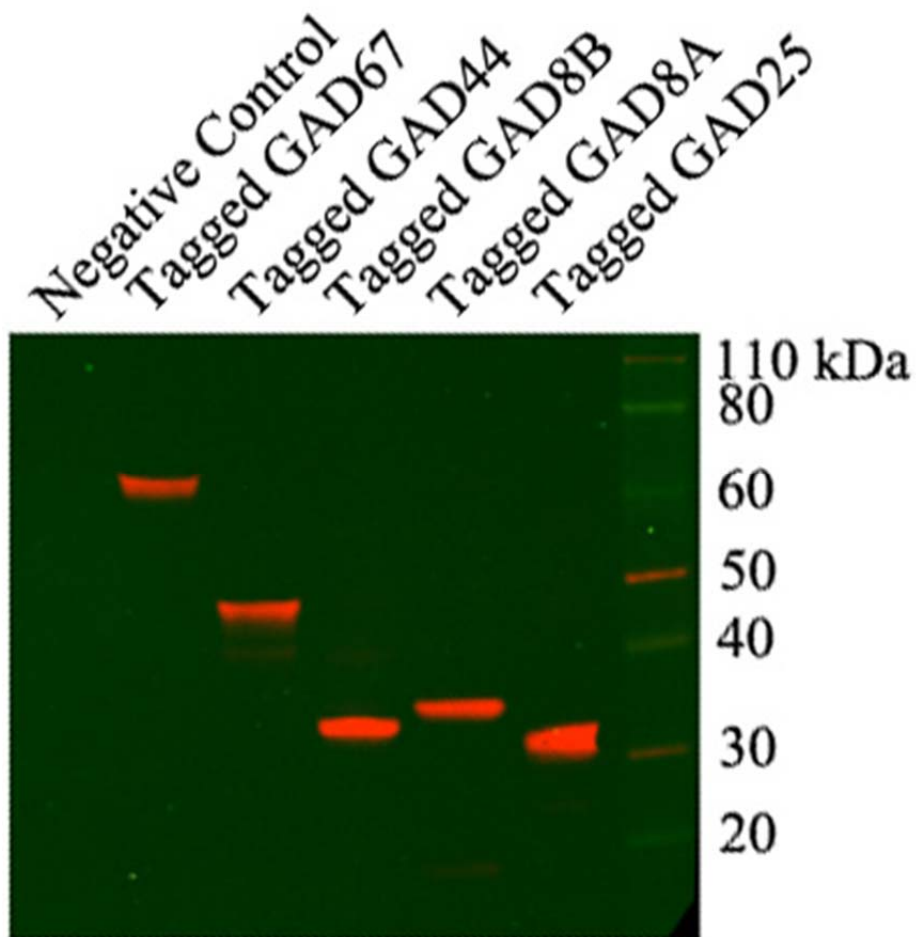

Supplement: NIHMS1635154-supplement-Suppl2.pdf [file NIHMS1635154-supplement-Suppl2.pdf]
